# Supplementary material
Source: publisher figshare collection journal article supplement (https://sage.figshare.com/ndownloader/files/15631388)
Supplement: Supplementary file 1 [file 15631388]

## Shaping Healthy Choices Program – Gain-Framed and Loss-Framed Messages

| Curriculum                         | Module                                                         | Gain-Framed Message                                                                              | Loss-Framed Message                                                                                         |
|------------------------------------|----------------------------------------------------------------|--------------------------------------------------------------------------------------------------|-------------------------------------------------------------------------------------------------------------|
| <b>Healthy Choices in Motion</b>   | Module 1: The Benefits of Physical Activity                    | Make your heart and lungs stronger with activities that get your heart pumping!                  | Your heart and lungs may not be as strong when you are inactive.                                            |
|                                    | Module 2: Physical Activity Recommendations                    | Have more energy by getting at least 60 minutes of moderate/vigorous activity each day!          | You may not have as much energy when you get less than 60 minutes of moderate/vigorous activity each day.   |
|                                    | Module 3: Components of Physical Fitness                       | Build muscle and get stronger by doing all 5 components of physical fitness!                     | You may not get as strong or build as much muscle if you don't do all 5 components of physical fitness.     |
|                                    | Module 4: We Need a Variety of Physical Fitness                | Strengthen all of your different muscles by trying all kinds of new physical activities!         | You may not strengthen all of your muscles if you only do the same kinds of physical activities.            |
|                                    | Module 5: Being a Physically Active Person                     | Being physically active can help you sleep better!                                               | Being inactive may cause you to sleep poorly.                                                               |
| <b>Discovering Healthy Choices</b> | Module 1: Introduction to Nutrition, Agriculture and gardening | Be adventurous! Eat a variety of fruits and vegetables to help you get many different nutrients. | Don't be picky. Eating only a few kinds of fruits and vegetables limits the nutrients you get.              |
|                                    | Module 1.3                                                     | Gardens are a great way to learn about how different vegetables are grown.                       | Missing out on gardening means missing out on learning how different vegetables are grown.                  |
|                                    | Module 2: Getting Physically Active                            | Get nutrients to help your heart, brain, and lungs work better by making healthy food choices!   | Unhealthy food choices may not give you all the nutrients to help your heart, brain, and lungs work better. |
|                                    | Module 2.3                                                     | Get stronger by doing a combination of light,                                                    | You might not get as strong if you don't do a                                                               |

## Shaping Healthy Choices Program – Gain-Framed and Loss-Framed Messages

| Curriculum | Module                      | Gain-Framed Message                                                                                                                   | Loss-Framed Message                                                                                                                       |
|------------|-----------------------------|---------------------------------------------------------------------------------------------------------------------------------------|-------------------------------------------------------------------------------------------------------------------------------------------|
|            |                             | moderate, and vigorous intensity exercises!                                                                                           | combination of light, moderate, and vigorous intensity exercises.                                                                         |
|            | Module 3: Nutrients We Need | Eating a variety of healthy foods gives you energy to play and feel strong!                                                           | You may not have enough energy to play and feel strong if you don't eat a variety of healthy foods.                                       |
|            | Module 3.3                  | Eat a lot of different vegetables to get a variety of nutrients!                                                                      | When you only eat the same foods, you may not get a variety of nutrients.                                                                 |
|            | Module 4: Food Math         | Understand what's in your food by reading the Nutrition Facts Label.                                                                  | You may not know what's in your food unless you read the Nutrition Facts Label.                                                           |
|            | Module 4.3                  | Use measuring tools to know how many servings you're eating.                                                                          | You may not know how many servings you're eating if you don't use measuring tools.                                                        |
|            | Module 5: MyPlate           | Make at least half of your plate fruits and vegetables to feel good and have more energy to play!                                     | You may not feel as good and have as much energy to play if you don't make at least half of your plate fruits and vegetables.             |
|            | Module 5.3                  | Rock the rainbow by eating colorful vegetables from all 5 MyPlate subgroups to power up your body!                                    | Not eating vegetables from all 5 MyPlate subgroups means your body may not feel as powerful.                                              |
|            | Module 6: Food Labels       | The Nutrition Facts label is a great place to check which nutrients are in your food. Your body needs lots of nutrients to be strong! | Your body needs lots of nutrients to be strong. You won't see which nutrients are in your food when you ignore the Nutrition Facts label. |
|            | Module 6.3                  | The Nutrition Facts label can help you choose foods with the nutrients you need to be active.                                         | When you ignore the Nutrition Facts label it can be harder to choose foods with the nutrients you need to be active.                      |
|            | Module 7: Consumerism       | Be smart! Pay attention and don't let commercials trick you into buying unhealthy                                                     | When you don't pay attention to commercials, you may be tricked into buying unhealthy foods                                               |

## Shaping Healthy Choices Program – Gain-Framed and Loss-Framed Messages

| Curriculum                        | Module                                         | Gain-Framed Message                                                                                          | Loss-Framed Message                                                                                                                                  |
|-----------------------------------|------------------------------------------------|--------------------------------------------------------------------------------------------------------------|------------------------------------------------------------------------------------------------------------------------------------------------------|
|                                   |                                                | foods because of prizes and cartoon characters.                                                              | because of prizes and cartoon characters.                                                                                                            |
|                                   | Module 7.3                                     | Eat the rainbow!<br>Different colored fruits and vegetables have many different nutrients to fuel your body. | If you don't eat fruits and vegetables of all colors of the rainbow you may not get as many nutrients to fuel your body.                             |
|                                   | Module 8: Making Healthy Snacks                | Eat healthy snacks, like a smoothie made from fruit and yogurt, to power your body with healthy nutrients!   | When hunger strikes and you don't make healthy snacks, like a smoothie made from fruit and yogurt, you may miss out on nutrients to power your body. |
|                                   | Module 8.2                                     | Make creative snacks, like finger salads, to enjoy vegetables in new ways!                                   | You may get bored of eating your vegetables if you don't make creative snacks, like finger salads.                                                   |
| <b>Cooking Up Healthy Choices</b> | Module 1: Fresh Fall Salad                     | Discover new healthy foods by trying foods from different regions and cultures!                              | You may miss out on new healthy foods when you don't try foods from different regions and cultures.                                                  |
|                                   | Module 2: Black Bean and Vegetable Tostada Ole | Fill up on healthy foods by eating foods with protein and fiber!                                             | You might not stay full as long when you don't eat foods with protein and fiber.                                                                     |
|                                   | Module 3: Veg-Out Chilean Stew                 | Strengthen your body's defenses with veggie-packed foods, like the Veg-Out Chilean Stew!                     | Without veggie-packed foods, like the Veg-Out Chilean Stew, your body's defenses may not be as strong.                                               |
|                                   | Module 4: Delicious Dunking Dip                | For a tasty snack, dunk your favorite veggies and whole-grains in the Delicious Dunking Dip!                 | Not all dips are good for your body. You might miss out on great nutrients if you choose unhealthy dips.                                             |

**Shaping Healthy Choices Program – Gain-Framed and Loss-Framed Messages**

| Curriculum | Module                        | Gain-Framed Message                                                                | Loss-Framed Message                                                                                      |
|------------|-------------------------------|------------------------------------------------------------------------------------|----------------------------------------------------------------------------------------------------------|
|            | Module 5: Stir-It-Up Stir Fry | Make fun vegetable stir-fries to easily get many different vegetables in one bite! | Not making fun vegetable stir-fries means it may be harder to get many different vegetables in one bite. |
